# Supplementary material for: Identification of novel prognostic biomarkers in renal cell carcinoma
Source: publisher site journal article supplement (doi:10.18632/aging.104131), 2020-11-21
Supplement: Supplementary file [file aging-v12i24-104131-supplementary-material-SD3.pdf]

**SUPPLEMENTARY TABLES**

**Supplementary Table 2. Multivariate Cox regression analysis of pronostic biomarkers for OS.**

| Gene      | Multivariate Cox regression analysis |             |             | Coefficient  |
|-----------|--------------------------------------|-------------|-------------|--------------|
|           | HR                                   | Low 95% CI  | High 95% CI |              |
| WDR72     | 0.924252937                          | 0.835673516 | 1.022221567 | -0.078769504 |
| ALDH6A1   | 0.841058328                          | 0.722946199 | 0.978467156 | -0.173094266 |
| CDS1      | 1.206009676                          | 0.992697351 | 1.465158881 | 0.187317122  |
| HADH      | 0.553366621                          | 0.385647718 | 0.794026783 | -0.59173453  |
| DNASE1L3  | 0.859011757                          | 0.76805078  | 0.960745329 | -0.15197267  |
| CLDN10    | 0.890757465                          | 0.808626404 | 0.981230464 | -0.115683094 |
| miR-21-5p | 1.237694323                          | 0.931886916 | 1.64385529  | 0.213250232  |

**Supplementary Table 3. Multivariate Cox regression analysis of pronostic biomarkers for DFS.**

| Gene     | Multivariate Cox regression analysis |             |             | Coefficient  |
|----------|--------------------------------------|-------------|-------------|--------------|
|          | HR                                   | Low 95% CI  | High 95% CI |              |
| WDR72    | 0.913106585                          | 0.830464779 | 1.003972302 | -0.090902664 |
| ALDH6A1  | 0.827531871                          | 0.712829082 | 0.960691721 | 0.827531871  |
| OGDHL    | 0.933006303                          | 0.853832    | 1.019522296 | 0.933006303  |
| HADH     | 0.674380721                          | 0.469142544 | 0.969405487 | 0.674380721  |
| DNASE1L3 | 0.800762037                          | 0.718979677 | 0.891846961 | 0.800762037  |
