# Supplementary material for: Identification of novel prognostic biomarkers in renal cell carcinoma
Source: Aging (Albany NY). 2020 Nov 21;12(24):25304–18. doi: 10.18632/aging.104131 (PMC7803519; doi:10.18632/aging.104131)
Supplement: Supplementary Table 1 [file aging-12-104131-s002.xlsx]

## Sheet: survival-related gene in KIR
Supplementary Table 1. Survival-related gene in KIR.
GEPIA2-DFS				GEPIA2-OS
Gene Symbol	Gene ID	P-Value (DFS)		Gene Symbol	Gene ID	P-Value (OS)
GRAMD1C	ENSG00000178075.19	2.02e-11		PEBP1P2	ENSG00000270532.1	1.85e-14
ENAM	ENSG00000132464.11	3.31e-11		RP11-379F4.8	ENSG00000271778.1	3.42e-14
ASTN2	ENSG00000148219.16	4.89e-11		SOWAHB	ENSG00000186212.3	1.84e-13
WDR72	ENSG00000166415.14	1.31e-10		CPT2	ENSG00000157184.5	1.92e-13
EPB41L5	ENSG00000115109.13	2.39e-10		WDR72	ENSG00000166415.14	2.25e-13
SLC27A2	ENSG00000140284.10	3.1e-10		DHRS12	ENSG00000102796.10	1.3e-12
C1orf210	ENSG00000253313.5	3.59e-10		TOLLIP	ENSG00000078902.15	1.44e-12
BSPRY	ENSG00000119411.10	5.62e-10		TPRG1L	ENSG00000158109.14	1.59e-12
AC067959.1	ENSG00000233005.1	6.97e-10		BAG1	ENSG00000107262.16	3.58e-12
LINC01507	ENSG00000230945.1	7.5e-10		SLC1A1	ENSG00000106688.11	5.68e-12
CPT2	ENSG00000157184.5	7.97e-10		DDAH1	ENSG00000153904.18	7.01e-12
FANCC	ENSG00000158169.11	1.12e-09		DMGDH	ENSG00000132837.14	7.59e-12
MAT1A	ENSG00000151224.12	1.25e-09		C1orf210	ENSG00000253313.5	7.72e-12
SLC1A1	ENSG00000106688.11	1.4e-09		IL20RB	ENSG00000174564.12	7.83e-12
FREM2	ENSG00000150893.10	1.84e-09		FBXO3	ENSG00000110429.13	1.17e-11
CBR4	ENSG00000145439.11	2.45e-09		FZD1	ENSG00000157240.3	1.48e-11
CBWD1	ENSG00000172785.18	2.67e-09		PAIP2B	ENSG00000124374.8	1.51e-11
C9orf156	ENSG00000136932.13	3.02e-09		CYP3A7	ENSG00000160870.12	1.72e-11
ALAD	ENSG00000148218.15	3.28e-09		CRB3	ENSG00000130545.15	1.8e-11
PLEKHF2	ENSG00000175895.3	4.26e-09		KL	ENSG00000133116.7	1.87e-11
PAQR5	ENSG00000137819.13	4.31e-09		MPP7	ENSG00000150054.18	2.05e-11
AUH	ENSG00000148090.11	4.53e-09		GIPC2	ENSG00000137960.5	2.07e-11
ALG2	ENSG00000119523.9	4.86e-09		TMEM38B	ENSG00000095209.11	2.09e-11
TOLLIP	ENSG00000078902.15	5.27e-09		SORBS2	ENSG00000154556.17	2.59e-11
SLN	ENSG00000170290.3	5.67e-09		RP11-343C2.11	ENSG00000260914.3	2.72e-11
CDS1	ENSG00000163624.5	6.06e-09		NDUFB6	ENSG00000165264.10	3.37e-11
RP11-817O13.9	ENSG00000275645.1	6.56e-09		PANK1	ENSG00000152782.16	3.41e-11
PMPCA	ENSG00000165688.11	6.63e-09		SLC16A12	ENSG00000152779.13	3.52e-11
ENPP5	ENSG00000112796.9	6.86e-09		BBOX1	ENSG00000129151.8	4.23e-11
CDC42BPG	ENSG00000171219.8	6.9e-09		RETSAT	ENSG00000042445.13	4.25e-11
RP11-598F7.4	ENSG00000249695.6	7.71e-09		HNMT	ENSG00000150540.13	4.25e-11
SOWAHB	ENSG00000186212.3	7.8e-09		RP11-407N17.3	ENSG00000258941.3	4.59e-11
FBP1	ENSG00000165140.9	8.07e-09		DMRTA1	ENSG00000176399.3	5.41e-11
LINC00997	ENSG00000281332.1	8.52e-09		ANK3	ENSG00000151150.20	5.66e-11
AQP1	ENSG00000240583.10	8.62e-09		CRYL1	ENSG00000165475.13	5.94e-11
TOX3	ENSG00000103460.16	9.9e-09		C11orf54	ENSG00000182919.14	7.17e-11
LYRM9	ENSG00000232859.9	1.08e-08		G6PC	ENSG00000131482.9	7.58e-11
MRPL50	ENSG00000136897.7	1.18e-08		SPATA18	ENSG00000163071.10	7.82e-11
RGP1	ENSG00000107185.9	1.29e-08		SOX6	ENSG00000110693.15	8.75e-11
GNE	ENSG00000159921.14	1.31e-08		RP11-416A14.1	ENSG00000270040.1	8.91e-11
CRAT	ENSG00000095321.16	1.35e-08		HIBCH	ENSG00000198130.14	9.55e-11
RP11-204M4.2	ENSG00000204837.3	1.48e-08		GALK2	ENSG00000156958.14	1.02e-10
TMEM8B	ENSG00000137103.16	1.58e-08		MRPL49	ENSG00000149792.8	1.04e-10
LRRC19	ENSG00000184434.7	1.6e-08		COL7A1	ENSG00000114270.15	1.21e-10
MRRF	ENSG00000148187.17	1.75e-08		TLN2	ENSG00000171914.14	1.25e-10
ABCC4	ENSG00000125257.13	1.86e-08		NCR3LG1	ENSG00000188211.8	1.46e-10
FKBP10	ENSG00000141756.18	2.04e-08		TMEM126B	ENSG00000171204.12	1.5e-10
TBC1D14	ENSG00000132405.18	2.05e-08		SNX30	ENSG00000148158.16	1.5e-10
BAG1	ENSG00000107262.16	2.11e-08		MOB3B	ENSG00000120162.9	1.58e-10
WDR31	ENSG00000148225.15	2.46e-08		ACADM	ENSG00000117054.13	1.76e-10
RP5-884M6.1	ENSG00000228742.9	2.52e-08		PAFAH2	ENSG00000158006.13	1.79e-10
TRPM3	ENSG00000083067.22	2.57e-08		ALDH6A1	ENSG00000119711.12	1.81e-10
HIBCH	ENSG00000198130.14	3.08e-08		ASTN2	ENSG00000148219.16	1.82e-10
CLCN5	ENSG00000171365.15	3.12e-08		SAMM50	ENSG00000100347.14	1.94e-10
G6PC	ENSG00000131482.9	3.18e-08		ZNF658	ENSG00000274349.4	2.13e-10
SPTLC3	ENSG00000172296.12	3.94e-08		HS1BP3	ENSG00000118960.12	2.32e-10
TJP2	ENSG00000119139.16	4.29e-08		RP11-626G11.3	ENSG00000261759.1	2.44e-10
SLC25A4	ENSG00000151729.10	4.29e-08		CYP3A4	ENSG00000160868.14	2.51e-10
RP11-132F7.2	ENSG00000279427.1	4.67e-08		ENPP5	ENSG00000112796.9	2.61e-10
UNC5D	ENSG00000156687.10	4.86e-08		SH3BGRL2	ENSG00000198478.7	2.63e-10
COX18	ENSG00000163626.16	5.21e-08		ATP6V1G1	ENSG00000136888.6	2.66e-10
ZBTB5	ENSG00000168795.4	5.85e-08		RP11-89H19.2	ENSG00000278385.1	2.71e-10
KCNG1	ENSG00000026559.13	5.91e-08		PIGV	ENSG00000060642.10	2.81e-10
STK32B	ENSG00000152953.12	6.02e-08		PAQR5	ENSG00000137819.13	2.97e-10
TDRD7	ENSG00000196116.7	6.09e-08		EPB41L4A-AS2	ENSG00000278921.2	3.19e-10
TSPYL1	ENSG00000189241.6	6.13e-08		DMXL1	ENSG00000172869.14	3.2e-10
CDC14B	ENSG00000081377.16	6.39e-08		AQP1	ENSG00000240583.10	3.71e-10
RETSAT	ENSG00000042445.13	6.42e-08		AKTIP	ENSG00000166971.16	3.85e-10
ZNF540	ENSG00000171817.16	6.52e-08		RP4-635A23.6	ENSG00000279838.1	3.86e-10
DOCK8	ENSG00000107099.15	6.54e-08		AFG3L2	ENSG00000141385.9	3.9e-10
SAMM50	ENSG00000100347.14	7.03e-08		C9orf156	ENSG00000136932.13	3.9e-10
APTX	ENSG00000137074.18	7.99e-08		FNIP2	ENSG00000052795.12	4.09e-10
ECHDC3	ENSG00000134463.14	8.12e-08		IQGAP2	ENSG00000145703.15	4.34e-10
CAAP1	ENSG00000120159.11	8.77e-08		SAA2	ENSG00000134339.8	4.46e-10
CLUHP3	ENSG00000131797.12	8.95e-08		NBR1	ENSG00000188554.13	4.62e-10
DMRTA1	ENSG00000176399.3	9.62e-08		PLEKHF2	ENSG00000175895.3	4.69e-10
MICU1	ENSG00000107745.16	9.66e-08		AUH	ENSG00000148090.11	4.85e-10
OVOL1	ENSG00000172818.9	9.96e-08		TAL2	ENSG00000186051.6	4.87e-10
TTC39B	ENSG00000155158.20	1.01e-07		SLC2A9	ENSG00000109667.11	5.27e-10
HDHD3	ENSG00000119431.9	1.02e-07		OTX1	ENSG00000115507.9	6.24e-10
DHDH	ENSG00000104808.7	1.02e-07		RSG1	ENSG00000132881.11	6.3e-10
FRMD3	ENSG00000172159.15	1.03e-07		ESD	ENSG00000139684.13	6.37e-10
FAM122A	ENSG00000187866.7	1.04e-07		ILVBL	ENSG00000105135.15	6.41e-10
PTPN3	ENSG00000070159.13	1.08e-07		SGCB	ENSG00000163069.12	6.49e-10
ZC3H7B	ENSG00000100403.11	1.11e-07		DLX4	ENSG00000108813.10	6.56e-10
TRIM13	ENSG00000204977.9	1.13e-07		RP11-2E11.9	ENSG00000270953.1	6.58e-10
RP11-352D13.6	ENSG00000261634.3	1.3e-07		MYO6	ENSG00000196586.13	6.85e-10
NCR3LG1	ENSG00000188211.8	1.32e-07		FREM2	ENSG00000150893.10	7.25e-10
IMPA2	ENSG00000141401.11	1.33e-07		DMRT3	ENSG00000064218.4	7.46e-10
HSDL2	ENSG00000119471.14	1.36e-07		RP11-16E12.2	ENSG00000259772.6	7.71e-10
CYP4V2	ENSG00000145476.15	1.36e-07		DENND1C	ENSG00000205744.9	8.1e-10
LRP2	ENSG00000081479.12	1.41e-07		IGBP1	ENSG00000089289.15	8.19e-10
SIRT5	ENSG00000124523.14	1.45e-07		CCDC121	ENSG00000176714.9	8.73e-10
FAM120AOS	ENSG00000188938.15	1.49e-07		MRPS18B	ENSG00000204568.11	8.84e-10
ITPKA	ENSG00000137825.10	1.57e-07		EZR	ENSG00000092820.17	9.13e-10
EPB41L4A-AS2	ENSG00000278921.2	1.62e-07		DCST2	ENSG00000163354.14	9.35e-10
TFAP2A	ENSG00000137203.10	1.67e-07		F2RL1	ENSG00000164251.4	9.93e-10
SH3BGRL2	ENSG00000198478.7	1.77e-07		MRPL50	ENSG00000136897.7	1.06e-09
MTFR1L	ENSG00000117640.17	1.81e-07		FAHD1	ENSG00000180185.11	1.08e-09
SHISA9	ENSG00000237515.7	1.82e-07		KIF13B	ENSG00000197892.12	1.1e-09
HSD11B2	ENSG00000176387.6	1.84e-07		LAMTOR3	ENSG00000109270.12	1.15e-09
PEX3	ENSG00000034693.14	1.87e-07		SALL1	ENSG00000103449.11	1.21e-09
GIPC2	ENSG00000137960.5	1.93e-07		KIAA1191	ENSG00000122203.14	1.22e-09
PAIP2B	ENSG00000124374.8	2e-07		ATP6V1C2	ENSG00000143882.9	1.26e-09
C11orf54	ENSG00000182919.14	2.37e-07		TMEM27	ENSG00000147003.5	1.35e-09
NME4	ENSG00000103202.12	2.41e-07		HADHB	ENSG00000138029.13	1.36e-09
ERBB2	ENSG00000141736.13	2.44e-07		PLCL2	ENSG00000154822.15	1.37e-09
ARHGAP24	ENSG00000138639.17	2.56e-07		SNX2	ENSG00000205302.6	1.38e-09
TBC1D13	ENSG00000107021.15	2.61e-07		MUT	ENSG00000146085.7	1.41e-09
DNASE1L3	ENSG00000163687.13	2.63e-07		EIF4EBP2	ENSG00000148730.6	1.41e-09
HSPA4L	ENSG00000164070.11	2.63e-07		LRBA	ENSG00000198589.10	1.46e-09
TMEM38B	ENSG00000095209.11	2.69e-07		TRPM3	ENSG00000083067.22	1.48e-09
HOMEZ	ENSG00000215271.7	2.74e-07		DPP4	ENSG00000197635.9	1.51e-09
ZNRF3	ENSG00000183579.15	2.9e-07		CDC14B	ENSG00000081377.16	1.52e-09
AC156455.1	ENSG00000256546.1	3.03e-07		CDS1	ENSG00000163624.5	1.54e-09
ZDHHC21	ENSG00000175893.11	3.12e-07		SLC25A4	ENSG00000151729.10	1.61e-09
ZNF433	ENSG00000197647.11	3.33e-07		ARHGAP10	ENSG00000071205.11	1.61e-09
BPGM	ENSG00000172331.11	3.38e-07		RP11-49I11.1	ENSG00000260552.1	1.64e-09
ELOVL7	ENSG00000164181.13	3.44e-07		KCNJ15	ENSG00000157551.17	1.69e-09
LRRK2	ENSG00000188906.13	3.45e-07		FLRT3	ENSG00000125848.9	1.7e-09
ACOX1	ENSG00000161533.11	3.59e-07		GBA3	ENSG00000249948.6	1.72e-09
UNC13B	ENSG00000198722.12	3.71e-07		SEPP1	ENSG00000250722.5	1.75e-09
SLC6A19	ENSG00000174358.15	3.8e-07		RAB3IP	ENSG00000127328.21	1.76e-09
TREH	ENSG00000118094.11	3.81e-07		ZC3H12C	ENSG00000149289.10	1.77e-09
FBXO7	ENSG00000100225.17	4.13e-07		SLC22A4	ENSG00000197208.5	1.77e-09
RP11-27I1.4	ENSG00000214654.6	4.27e-07		MTURN	ENSG00000180354.15	1.81e-09
GLYATL1	ENSG00000166840.13	4.69e-07		ELOVL7	ENSG00000164181.13	1.82e-09
HAO2	ENSG00000116882.14	4.84e-07		TOB2	ENSG00000183864.4	1.89e-09
PACSIN2	ENSG00000100266.17	4.9e-07		CHMP5	ENSG00000086065.13	1.9e-09
ZER1	ENSG00000160445.10	4.92e-07		MAP7	ENSG00000135525.18	1.95e-09
XPA	ENSG00000136936.10	4.93e-07		EMCN	ENSG00000164035.9	1.98e-09
DYNLL2	ENSG00000264364.2	4.97e-07		EBAG9	ENSG00000147654.14	1.98e-09
TCL6	ENSG00000187621.14	5.25e-07		WDR31	ENSG00000148225.15	2e-09
ZFP3	ENSG00000180787.5	5.36e-07		IRF6	ENSG00000117595.10	2.14e-09
SNAPC3	ENSG00000164975.15	5.42e-07		VWA8	ENSG00000102763.15	2.2e-09
WDFY3-AS2	ENSG00000180769.8	5.48e-07		SUCLA2	ENSG00000136143.13	2.32e-09
PDPK1	ENSG00000140992.18	5.57e-07		ACAA2	ENSG00000167315.17	2.36e-09
NMNAT1	ENSG00000173614.13	5.59e-07		RP11-15H20.6	ENSG00000213971.7	2.37e-09
PVRL3	ENSG00000177707.10	5.6e-07		RP11-152H18.3	ENSG00000254665.1	2.44e-09
AC079630.2	ENSG00000223914.1	6e-07		SIK2	ENSG00000170145.4	2.6e-09
AGPAT9	ENSG00000138678.10	6.03e-07		LRP2	ENSG00000081479.12	2.7e-09
AP000230.1	ENSG00000273492.5	6.1e-07		TMBIM1	ENSG00000135926.12	2.77e-09
CALCOCO1	ENSG00000012822.15	6.15e-07		TLR3	ENSG00000164342.12	2.8e-09
PITX2	ENSG00000164093.15	6.21e-07		SLC25A42	ENSG00000181035.13	2.87e-09
SLC3A1	ENSG00000138079.13	6.33e-07		LRRC28	ENSG00000168904.14	2.91e-09
PRAME	ENSG00000185686.17	6.36e-07		METTL7A	ENSG00000185432.11	2.96e-09
LRBA	ENSG00000198589.10	6.45e-07		COMMD3-BMI1	ENSG00000269897.5	2.97e-09
SESTD1	ENSG00000187231.13	6.64e-07		PLXNB3	ENSG00000198753.11	3.01e-09
ATP6V1G1	ENSG00000136888.6	6.69e-07		LMBRD1	ENSG00000168216.10	3.02e-09
CDK2AP1	ENSG00000111328.6	6.81e-07		NCOA4	ENSG00000266412.5	3.03e-09
GRHPR	ENSG00000137106.17	6.93e-07		ITIH4	ENSG00000055955.15	3.09e-09
IRF6	ENSG00000117595.10	7.23e-07		ZNF821	ENSG00000102984.14	3.19e-09
DHRS12	ENSG00000102796.10	7.26e-07		RP11-297L17.2	ENSG00000260963.1	3.43e-09
TINAG	ENSG00000137251.15	7.4e-07		AMOT	ENSG00000126016.13	3.48e-09
CYP27A1	ENSG00000135929.8	7.46e-07		SCP2	ENSG00000116171.16	3.49e-09
ZNF330	ENSG00000109445.10	7.61e-07		TDRD7	ENSG00000196116.7	3.62e-09
CTC-327F10.4	ENSG00000251320.1	7.62e-07		ADCY9	ENSG00000162104.9	3.73e-09
VIPR1	ENSG00000114812.12	7.65e-07		MAT2B	ENSG00000038274.16	3.77e-09
UTP3	ENSG00000132467.3	7.65e-07		SMIM19	ENSG00000176209.11	4.12e-09
GK	ENSG00000198814.12	8.08e-07		SAA1	ENSG00000173432.10	4.34e-09
RP11-15H20.6	ENSG00000213971.7	8.09e-07		RP13-39P12.3	ENSG00000228748.2	4.35e-09
ILVBL	ENSG00000105135.15	8.38e-07		EHHADH	ENSG00000113790.10	4.45e-09
NUMB	ENSG00000133961.19	8.54e-07		SLC7A5	ENSG00000103257.8	4.47e-09
SMIM3	ENSG00000256235.1	8.58e-07		RNF185	ENSG00000138942.15	4.48e-09
ACSS3	ENSG00000111058.7	8.65e-07		GPR78	ENSG00000155269.11	4.52e-09
SLC5A1	ENSG00000100170.9	8.7e-07		RMDN3	ENSG00000137824.15	4.68e-09
SATB2	ENSG00000119042.16	8.81e-07		SLC3A1	ENSG00000138079.13	4.69e-09
HOXA13	ENSG00000106031.7	8.87e-07		CREBRF	ENSG00000164463.12	4.77e-09
ELOVL3	ENSG00000119915.4	9.23e-07		TMEM59	ENSG00000116209.11	4.97e-09
AC009166.5	ENSG00000261238.1	9.42e-07		CUBN	ENSG00000107611.14	5.28e-09
ASB17	ENSG00000154007.6	9.59e-07		TMEM150C	ENSG00000249242.7	5.33e-09
EMCN	ENSG00000164035.9	9.75e-07		ERBB2	ENSG00000141736.13	5.33e-09
ZCCHC12	ENSG00000174460.3	9.76e-07		EMX2	ENSG00000170370.11	5.52e-09
RP11-522I20.3	ENSG00000254473.1	9.77e-07		RP11-968A15.2	ENSG00000257596.1	5.55e-09
MRPL49	ENSG00000149792.8	9.82e-07		TMEM125	ENSG00000179178.10	5.63e-09
TRUB2	ENSG00000167112.9	9.92e-07		CDC37L1	ENSG00000106993.11	5.68e-09
FRMPD2	ENSG00000170324.19	1e-06		NALCN-AS1	ENSG00000233009.1	5.86e-09
TM7SF3	ENSG00000064115.10	1.01e-06		GJB1	ENSG00000169562.9	6.19e-09
DAB2IP	ENSG00000136848.16	1.03e-06		ZNF189	ENSG00000136870.10	6.33e-09
SOX6	ENSG00000110693.15	1.06e-06		DOCK8	ENSG00000107099.15	6.35e-09
NAPEPLD	ENSG00000161048.11	1.06e-06		SOWAHC	ENSG00000198142.4	6.35e-09
FKBP11	ENSG00000134285.10	1.07e-06		PRUNE2	ENSG00000106772.17	6.37e-09
ZNF189	ENSG00000136870.10	1.1e-06		DONSON	ENSG00000159147.17	6.48e-09
KL	ENSG00000133116.7	1.1e-06		LINC01234	ENSG00000249550.6	6.59e-09
RP11-386G11.10	ENSG00000258017.1	1.14e-06		RORA	ENSG00000069667.15	6.8e-09
CILP2	ENSG00000160161.9	1.15e-06		TEK	ENSG00000120156.20	6.88e-09
KLF10	ENSG00000155090.14	1.15e-06		ADH5	ENSG00000197894.10	7.16e-09
RMDN3	ENSG00000137824.15	1.16e-06		CDHR4	ENSG00000187492.8	7.16e-09
P3H1	ENSG00000117385.15	1.21e-06		MIA2	ENSG00000150526.11	7.3e-09
DENND4C	ENSG00000137145.20	1.26e-06		CILP	ENSG00000138615.5	7.35e-09
STOML2	ENSG00000165283.15	1.26e-06		PECR	ENSG00000115425.13	7.38e-09
L2HGDH	ENSG00000087299.11	1.27e-06		POLR1E	ENSG00000137054.15	7.41e-09
RAB3IP	ENSG00000127328.21	1.28e-06		WFDC10B	ENSG00000182931.9	7.43e-09
STEAP3	ENSG00000115107.19	1.29e-06		TRUB2	ENSG00000167112.9	7.51e-09
PKP4	ENSG00000144283.21	1.32e-06		GLYATL1	ENSG00000166840.13	7.52e-09
IYD	ENSG00000009765.14	1.32e-06		MGAM	ENSG00000257335.8	7.86e-09
EIF4EBP1	ENSG00000187840.4	1.33e-06		ZNF14	ENSG00000105708.8	7.98e-09
DPP4	ENSG00000197635.9	1.35e-06		TSPYL1	ENSG00000189241.6	8.1e-09
PPP6C	ENSG00000119414.11	1.35e-06		PDGFRL	ENSG00000104213.12	8.11e-09
C4orf19	ENSG00000154274.14	1.39e-06		EPB41L1	ENSG00000088367.20	8.42e-09
RP11-123K3.4	ENSG00000258830.1	1.43e-06		COL4A4	ENSG00000081052.11	8.42e-09
SLC35F5	ENSG00000115084.12	1.43e-06		CCDC103	ENSG00000167131.16	8.48e-09
SPATA18	ENSG00000163071.10	1.46e-06		DAB2IP	ENSG00000136848.16	8.51e-09
NFE2L3	ENSG00000050344.8	1.46e-06		NIPAL3	ENSG00000001461.16	8.54e-09
DNAJC25	ENSG00000059769.19	1.51e-06		CLCN5	ENSG00000171365.15	8.62e-09
CLVS2	ENSG00000146352.12	1.52e-06		B3GNTL1	ENSG00000175711.8	8.86e-09
C4orf36	ENSG00000163633.10	1.53e-06		RMND5B	ENSG00000145916.18	8.92e-09
MRPS2	ENSG00000122140.10	1.55e-06		ECI2	ENSG00000198721.12	8.99e-09
PDZK1	ENSG00000174827.13	1.56e-06		RASEF	ENSG00000165105.9	9.05e-09
IKBKAP	ENSG00000070061.14	1.58e-06		TMEM246	ENSG00000165152.8	9.32e-09
KIAA1456	ENSG00000250305.8	1.6e-06		ACOX1	ENSG00000161533.11	9.48e-09
ISCA1	ENSG00000135070.13	1.62e-06		KAT5	ENSG00000172977.12	9.58e-09
CTD-2284J15.1	ENSG00000254231.1	1.67e-06		AMD1	ENSG00000123505.14	9.78e-09
NR3C2	ENSG00000151623.14	1.69e-06		HERPUD1	ENSG00000051108.14	1.01e-08
PODNL1	ENSG00000132000.11	1.72e-06		CTB-50E14.5	ENSG00000269374.1	1.01e-08
WDR20	ENSG00000140153.17	1.74e-06		PHOSPHO2	ENSG00000144362.11	1.02e-08
MROH8	ENSG00000101353.14	1.76e-06		SLC45A4	ENSG00000022567.9	1.03e-08
IBA57	ENSG00000181873.12	1.79e-06		SLC27A2	ENSG00000140284.10	1.03e-08
MEGF9	ENSG00000106780.8	1.83e-06		CUBNP3	ENSG00000235690.2	1.07e-08
FLRT3	ENSG00000125848.9	1.83e-06		HABP4	ENSG00000130956.13	1.07e-08
EIF3J-AS1	ENSG00000179523.4	1.87e-06		CRYZ	ENSG00000116791.13	1.08e-08
NAT8	ENSG00000144035.3	1.89e-06		DYNLL2	ENSG00000264364.2	1.09e-08
HIRA	ENSG00000100084.14	1.92e-06		CRAT	ENSG00000095321.16	1.15e-08
C16orf86	ENSG00000159761.14	1.93e-06		RUNDC3B	ENSG00000105784.15	1.18e-08
ANKS6	ENSG00000165138.16	1.99e-06		BPNT1	ENSG00000162813.17	1.19e-08
PDK2	ENSG00000005882.11	2.03e-06		SASH1	ENSG00000111961.16	1.19e-08
PDGFRL	ENSG00000104213.12	2.05e-06		ISPD	ENSG00000214960.9	1.2e-08
OCIAD1	ENSG00000109180.14	2.07e-06		MED7	ENSG00000155868.7	1.2e-08
GUSBP5	ENSG00000236296.7	2.07e-06		HSPA4L	ENSG00000164070.11	1.21e-08
IDNK	ENSG00000148057.15	2.09e-06		NFU1	ENSG00000169599.12	1.24e-08
RP4-724E13.2	ENSG00000228204.2	2.12e-06		SENP8	ENSG00000166192.14	1.26e-08
VAPB	ENSG00000124164.15	2.13e-06		LRRC19	ENSG00000184434.7	1.26e-08
UBXN10	ENSG00000162543.5	2.19e-06		TMEM232	ENSG00000186952.14	1.28e-08
TMX2	ENSG00000213593.9	2.2e-06		RP11-386G11.10	ENSG00000258017.1	1.28e-08
CCDC183-AS1	ENSG00000228544.1	2.23e-06		FAM134A	ENSG00000144567.10	1.3e-08
PDCD5	ENSG00000105185.11	2.24e-06		FMO1	ENSG00000010932.15	1.33e-08
KDF1	ENSG00000175707.8	2.25e-06		ZXDA	ENSG00000198205.6	1.34e-08
RBM47	ENSG00000163694.14	2.25e-06		AC007036.5	ENSG00000251660.1	1.37e-08
NOXA1	ENSG00000188747.8	2.26e-06		AC090286.4	ENSG00000196893.3	1.38e-08
ZNF658B	ENSG00000198416.9	2.26e-06		AP5M1	ENSG00000053770.11	1.38e-08
PANK1	ENSG00000152782.16	2.28e-06		AJAP1	ENSG00000196581.10	1.41e-08
CLIC5	ENSG00000112782.15	2.29e-06		AC074212.5	ENSG00000259605.3	1.41e-08
MYL3	ENSG00000160808.9	2.32e-06		ZIC2	ENSG00000043355.10	1.44e-08
CRY2	ENSG00000121671.11	2.35e-06		ANXA8	ENSG00000265190.6	1.46e-08
FAM120A	ENSG00000048828.16	2.36e-06		SLC10A2	ENSG00000125255.6	1.46e-08
SNX30	ENSG00000148158.16	2.37e-06		RBM47	ENSG00000163694.14	1.46e-08
LINC00671	ENSG00000213373.7	2.37e-06		SSFA2	ENSG00000138434.16	1.48e-08
PHYH	ENSG00000107537.13	2.38e-06		MFAP1	ENSG00000140259.6	1.48e-08
TRIP4	ENSG00000103671.9	2.48e-06		FBXL5	ENSG00000118564.14	1.48e-08
KDELR3	ENSG00000100196.10	2.52e-06		UGT2A3	ENSG00000135220.10	1.5e-08
AMD1	ENSG00000123505.14	2.58e-06		NBEA	ENSG00000172915.18	1.53e-08
AP000439.3	ENSG00000255774.1	2.65e-06		PCGF5	ENSG00000180628.14	1.54e-08
AP000695.4	ENSG00000233818.1	2.66e-06		RP11-298J20.4	ENSG00000249456.1	1.55e-08
PLCL2	ENSG00000154822.15	2.69e-06		AKR1B10	ENSG00000198074.9	1.57e-08
SLC13A1	ENSG00000081800.8	2.7e-06		TNFRSF10A	ENSG00000104689.9	1.6e-08
MFHAS1	ENSG00000147324.10	2.88e-06		TOMM20	ENSG00000173726.10	1.61e-08
AP3S2	ENSG00000157823.16	2.88e-06		PDZK1	ENSG00000174827.13	1.61e-08
GLOD4	ENSG00000167699.13	2.94e-06		PITX1	ENSG00000069011.15	1.63e-08
LMBRD1	ENSG00000168216.10	2.99e-06		RP11-521I2.3	ENSG00000260368.1	1.68e-08
PAFAH2	ENSG00000158006.13	3.01e-06		RP11-161H23.5	ENSG00000258232.2	1.68e-08
RP11-554D20.2	ENSG00000273792.1	3.03e-06		FAM120A	ENSG00000048828.16	1.7e-08
ARHGAP10	ENSG00000071205.11	3.05e-06		TJP2	ENSG00000119139.16	1.72e-08
RP11-568K15.1	ENSG00000242193.9	3.08e-06		RP11-166N17.1	ENSG00000227253.3	1.76e-08
OGDHL	ENSG00000197444.9	3.1e-06		PCBP1	ENSG00000169564.6	1.77e-08
RP11-49I11.1	ENSG00000260552.1	3.1e-06		CX3CL1	ENSG00000006210.6	1.83e-08
MUT	ENSG00000146085.7	3.17e-06		ATP6V1A	ENSG00000114573.9	1.85e-08
VPS37B	ENSG00000139722.6	3.18e-06		HSDL2	ENSG00000119471.14	1.86e-08
MSI2	ENSG00000153944.10	3.21e-06		PRKAA2	ENSG00000162409.10	1.89e-08
ACAD8	ENSG00000151498.11	3.24e-06		ATP6V1E1	ENSG00000131100.12	1.9e-08
BBOX1	ENSG00000129151.8	3.24e-06		FUT6	ENSG00000156413.13	1.93e-08
TOPORS	ENSG00000197579.7	3.26e-06		RGP1	ENSG00000107185.9	1.96e-08
PPP1R26	ENSG00000196422.10	3.26e-06		PVRL3	ENSG00000177707.10	2e-08
SUCLA2	ENSG00000136143.13	3.27e-06		CALCRL	ENSG00000064989.12	2.02e-08
ZBTB34	ENSG00000177125.5	3.28e-06		ZNF366	ENSG00000178175.11	2.04e-08
AP003419.11	ENSG00000256514.1	3.31e-06		UFSP2	ENSG00000109775.10	2.05e-08
SEPSECS	ENSG00000109618.11	3.32e-06		AC107081.5	ENSG00000236498.1	2.12e-08
PECR	ENSG00000115425.13	3.44e-06		ITGA6	ENSG00000091409.14	2.12e-08
SMC5-AS1	ENSG00000268364.1	3.48e-06		NSA2	ENSG00000164346.9	2.13e-08
SSFA2	ENSG00000138434.16	3.49e-06		RP11-863K10.4	ENSG00000233170.4	2.15e-08
PTGFRN	ENSG00000134247.9	3.5e-06		UNC119B	ENSG00000175970.8	2.2e-08
DNAJC16	ENSG00000116138.12	3.53e-06		RP1-142L7.9	ENSG00000270661.1	2.2e-08
CNTNAP3B	ENSG00000154529.14	3.54e-06		CRIM1	ENSG00000150938.9	2.22e-08
ACAA2	ENSG00000167315.17	3.59e-06		LINC01550	ENSG00000246223.8	2.22e-08
TUBE1	ENSG00000074935.13	3.62e-06		OGDH	ENSG00000105953.14	2.3e-08
METTL20	ENSG00000139160.13	3.64e-06		RP11-531F16.4	ENSG00000273261.1	2.32e-08
TMEM232	ENSG00000186952.14	3.76e-06		POC1B	ENSG00000139323.13	2.33e-08
CTBP2	ENSG00000175029.16	3.8e-06		SDHD	ENSG00000204370.8	2.34e-08
LMO7	ENSG00000136153.19	3.91e-06		CEACAM1	ENSG00000079385.21	2.35e-08
RP11-161H23.5	ENSG00000258232.2	3.92e-06		TMEM92-AS1	ENSG00000251179.1	2.35e-08
CEACAM1	ENSG00000079385.21	3.95e-06		IGF1R	ENSG00000140443.13	2.37e-08
DHTKD1	ENSG00000181192.11	3.97e-06		CCNDBP1	ENSG00000166946.13	2.49e-08
ADH5	ENSG00000197894.10	3.99e-06		SLC40A1	ENSG00000138449.10	2.51e-08
MFSD4	ENSG00000174514.12	4.02e-06		SYNJ2BP	ENSG00000213463.4	2.53e-08
DENND1C	ENSG00000205744.9	4.04e-06		GPD1L	ENSG00000152642.10	2.55e-08
IQSEC3	ENSG00000120645.11	4.05e-06		KCNK5	ENSG00000164626.8	2.66e-08
RP11-343C2.11	ENSG00000260914.3	4.14e-06		STX7	ENSG00000079950.13	2.73e-08
ZNF124	ENSG00000196418.12	4.15e-06		SERINC1	ENSG00000111897.6	2.76e-08
PRDX2	ENSG00000167815.11	4.17e-06		METTL20	ENSG00000139160.13	2.82e-08
PKHD1	ENSG00000170927.14	4.25e-06		DHX40	ENSG00000108406.9	2.83e-08
POC1B	ENSG00000139323.13	4.26e-06		SESTD1	ENSG00000187231.13	2.85e-08
MARC2	ENSG00000117791.15	4.27e-06		TRAF3IP1	ENSG00000204104.11	2.87e-08
TMEM245	ENSG00000106771.12	4.31e-06		CRHBP	ENSG00000145708.10	2.88e-08
ZCCHC14	ENSG00000140948.11	4.31e-06		HYAL1	ENSG00000114378.16	2.89e-08
HMGN2P46	ENSG00000179362.14	4.38e-06		CHRM3	ENSG00000133019.11	2.93e-08
NUDT17	ENSG00000186364.11	4.44e-06		RP4-657E11.10	ENSG00000270728.1	2.93e-08
ZNF658	ENSG00000274349.4	4.45e-06		GLUD2	ENSG00000182890.4	2.94e-08
PRKCE	ENSG00000171132.13	4.46e-06		HELQ	ENSG00000163312.10	2.96e-08
AK3	ENSG00000147853.16	4.51e-06		RP11-336K24.12	ENSG00000273002.1	3e-08
SLC35D2	ENSG00000130958.11	4.51e-06		DLGAP1-AS2	ENSG00000262001.1	3e-08
TMEM82	ENSG00000162460.6	4.56e-06		ATXN7L3B	ENSG00000253719.3	3.01e-08
RP4-635A23.6	ENSG00000279838.1	4.64e-06		TPMT	ENSG00000137364.4	3.05e-08
TTYH1	ENSG00000167614.13	4.65e-06		IRF2BP2	ENSG00000168264.10	3.08e-08
MPHOSPH8	ENSG00000196199.13	4.65e-06		SWT1	ENSG00000116668.12	3.09e-08
ALDH8A1	ENSG00000118514.13	4.67e-06		NR3C2	ENSG00000151623.14	3.15e-08
C12orf49	ENSG00000111412.5	4.69e-06		LIFR	ENSG00000113594.9	3.15e-08
VPS13A	ENSG00000197969.11	4.74e-06		CPEB4	ENSG00000113742.12	3.25e-08
CHRM3	ENSG00000133019.11	4.77e-06		HBP1	ENSG00000105856.13	3.26e-08
NMRK1	ENSG00000106733.20	4.8e-06		CTB-133G6.1	ENSG00000263264.1	3.36e-08
HELQ	ENSG00000163312.10	4.87e-06		GATM	ENSG00000171766.15	3.43e-08
PPFIBP1	ENSG00000110841.13	4.89e-06		OGDHL	ENSG00000197444.9	3.54e-08
HDHD2	ENSG00000167220.11	4.94e-06		CNPPD1	ENSG00000115649.15	3.56e-08
ACO2	ENSG00000100412.15	4.99e-06		RP11-84A19.4	ENSG00000269967.1	3.57e-08
CDK20	ENSG00000156345.17	5.07e-06		TACC1	ENSG00000147526.19	3.58e-08
NEBL	ENSG00000078114.18	5.1e-06		GAREM	ENSG00000141441.15	3.6e-08
MYOT	ENSG00000120729.9	5.15e-06		ECHDC3	ENSG00000134463.14	3.61e-08
LIFR	ENSG00000113594.9	5.16e-06		CCDC186	ENSG00000165813.16	3.64e-08
TIMM10B	ENSG00000132286.11	5.18e-06		BSPRY	ENSG00000119411.10	3.7e-08
TMEM125	ENSG00000179178.10	5.25e-06		LDAH	ENSG00000118961.14	3.71e-08
WFDC3	ENSG00000124116.18	5.25e-06		ALAD	ENSG00000148218.15	3.75e-08
RAB17	ENSG00000124839.12	5.33e-06		VAC14-AS1	ENSG00000214353.7	3.78e-08
MYL5	ENSG00000215375.6	5.36e-06		RMDN2	ENSG00000115841.19	3.78e-08
RNF152	ENSG00000176641.10	5.41e-06		TMEM82	ENSG00000162460.6	3.83e-08
SLC25A44	ENSG00000160785.13	5.45e-06		PIAS1	ENSG00000033800.13	3.83e-08
MAP7	ENSG00000135525.18	5.49e-06		BCL2	ENSG00000171791.11	3.84e-08
FBXO3	ENSG00000110429.13	5.62e-06		SAA2-SAA4	ENSG00000255071.3	3.91e-08
STARD13-AS	ENSG00000236581.8	5.63e-06		RPLP0P2	ENSG00000243742.5	3.93e-08
APOOL	ENSG00000155008.13	5.65e-06		NCOA7	ENSG00000111912.18	3.98e-08
GFPT2	ENSG00000131459.12	5.7e-06		DUSP11	ENSG00000144048.10	3.99e-08
PTAR1	ENSG00000188647.12	5.72e-06		TMEM25	ENSG00000149582.15	4.12e-08
C1S	ENSG00000182326.14	5.81e-06		GRAMD1C	ENSG00000178075.19	4.14e-08
CLDN10	ENSG00000134873.9	5.82e-06		MAPK8IP1	ENSG00000121653.11	4.19e-08
RP11-152H18.3	ENSG00000254665.1	5.82e-06		UGT2B7	ENSG00000171234.13	4.19e-08
BCL2L2	ENSG00000129473.9	5.83e-06		METTL24	ENSG00000053328.8	4.2e-08
PPM1A	ENSG00000100614.17	5.84e-06		EVC	ENSG00000072840.12	4.21e-08
SLC22A2	ENSG00000112499.12	5.85e-06		FRMD3	ENSG00000172159.15	4.21e-08
MTFMT	ENSG00000103707.9	5.87e-06		ZNF549	ENSG00000121406.8	4.32e-08
DLST	ENSG00000119689.14	5.9e-06		MRPL46	ENSG00000259494.1	4.41e-08
C5orf46	ENSG00000178776.4	5.96e-06		LMTK2	ENSG00000164715.5	4.46e-08
RN7SL181P	ENSG00000243738.3	6.07e-06		RNF20	ENSG00000155827.11	4.51e-08
NFX1	ENSG00000086102.18	6.09e-06		ACADSB	ENSG00000196177.12	4.55e-08
ALDH6A1	ENSG00000119711.12	6.09e-06		ITPKA	ENSG00000137825.10	4.66e-08
TNFRSF19	ENSG00000127863.15	6.11e-06		ACAT1	ENSG00000075239.13	4.72e-08
LGALS3BP	ENSG00000108679.12	6.12e-06		ITM2B	ENSG00000136156.12	4.77e-08
SLC22A13	ENSG00000172940.11	6.14e-06		CHTF8	ENSG00000168802.12	4.83e-08
SGK1	ENSG00000118515.11	6.19e-06		TNFRSF19	ENSG00000127863.15	4.86e-08
MYO6	ENSG00000196586.13	6.24e-06		AKAP6	ENSG00000151320.10	4.91e-08
CC2D2A	ENSG00000048342.15	6.29e-06		HSD17B8	ENSG00000204228.3	4.95e-08
PIGO	ENSG00000165282.13	6.34e-06		WARS2	ENSG00000116874.11	4.95e-08
DNAJC1	ENSG00000136770.10	6.53e-06		FAM63A	ENSG00000143409.15	4.99e-08
MOB3B	ENSG00000120162.9	6.54e-06		FITM2	ENSG00000197296.5	5.02e-08
MARVELD2	ENSG00000152939.14	6.59e-06		C7orf61	ENSG00000185955.4	5.08e-08
RP11-1113L8.1	ENSG00000262769.1	6.61e-06		GPR160	ENSG00000173890.16	5.1e-08
TMX2P1	ENSG00000213839.4	6.62e-06		FAM160A1	ENSG00000164142.15	5.1e-08
TRAF6	ENSG00000175104.14	6.7e-06		FAM86C2P	ENSG00000160172.10	5.14e-08
SGCB	ENSG00000163069.12	6.73e-06		AGPAT5	ENSG00000155189.11	5.15e-08
GLS2	ENSG00000135423.12	6.79e-06		ATXN1L	ENSG00000224470.7	5.21e-08
CIT	ENSG00000122966.13	6.81e-06		ABHD6	ENSG00000163686.13	5.22e-08
ZNF79	ENSG00000196152.10	6.88e-06		PURA	ENSG00000185129.5	5.22e-08
SLC6A13	ENSG00000010379.15	6.89e-06		HADH	ENSG00000138796.15	5.23e-08
DCAF11	ENSG00000100897.17	6.93e-06		AC005062.2	ENSG00000243004.5	5.25e-08
SECISBP2	ENSG00000187742.14	6.96e-06		FBXO21	ENSG00000135108.14	5.28e-08
ZNF426	ENSG00000130818.10	6.99e-06		ALDH2	ENSG00000111275.12	5.38e-08
NBEA	ENSG00000172915.18	7e-06		DHFRL1	ENSG00000178700.7	5.49e-08
CDC37L1	ENSG00000106993.11	7.08e-06		NDFIP1	ENSG00000131507.10	5.51e-08
RP11-309L24.6	ENSG00000224163.4	7.1e-06		FBXO7	ENSG00000100225.17	5.57e-08
PRPF4	ENSG00000136875.12	7.22e-06		ZNF583	ENSG00000198440.9	5.59e-08
SPIN1	ENSG00000106723.16	7.29e-06		PLS1	ENSG00000120756.12	5.72e-08
SLC31A1	ENSG00000136868.10	7.34e-06		KB-1208A12.3	ENSG00000245970.2	5.77e-08
MICU2	ENSG00000165487.13	7.35e-06		PPAP2B	ENSG00000162407.8	5.84e-08
SUCLG2-AS1	ENSG00000241316.6	7.63e-06		PEX3	ENSG00000034693.14	5.88e-08
MTURN	ENSG00000180354.15	7.68e-06		ENAM	ENSG00000132464.11	5.92e-08
VIL1	ENSG00000127831.10	7.69e-06		TNIP1	ENSG00000145901.14	5.98e-08
FUBP3	ENSG00000107164.15	7.73e-06		RAB21	ENSG00000080371.5	6.01e-08
C1R	ENSG00000159403.15	7.74e-06		PHYHIPL	ENSG00000165443.11	6.09e-08
SLC2A8	ENSG00000136856.17	7.84e-06		NPY6R	ENSG00000226306.6	6.27e-08
RP1-232L22__B.1	ENSG00000178146.9	7.93e-06		SPTBN1	ENSG00000115306.15	6.29e-08
CDNF	ENSG00000185267.9	7.97e-06		RP11-49I11.4	ENSG00000274849.1	6.32e-08
EPS8	ENSG00000151491.12	7.98e-06		RP11-46B11.2	ENSG00000220154.2	6.52e-08
CYP2J2	ENSG00000134716.9	8.1e-06		TRAF6	ENSG00000175104.14	6.55e-08
SMU1	ENSG00000122692.8	8.14e-06		PEX19	ENSG00000162735.18	6.55e-08
PI3	ENSG00000124102.4	8.45e-06		RP11-372K14.2	ENSG00000270681.1	6.55e-08
CRYL1	ENSG00000165475.13	8.54e-06		SLC44A1	ENSG00000070214.15	6.57e-08
MFN2	ENSG00000116688.16	8.61e-06		NMNAT1	ENSG00000173614.13	6.6e-08
DMGDH	ENSG00000132837.14	8.64e-06		TRPV3	ENSG00000167723.14	6.67e-08
BDH2	ENSG00000164039.14	8.79e-06		KCNAB1	ENSG00000169282.17	6.68e-08
DPH6	ENSG00000134146.11	8.8e-06		STX3	ENSG00000166900.14	6.76e-08
OTUD6B-AS1	ENSG00000253738.1	8.83e-06		DNAJB14	ENSG00000164031.16	6.86e-08
SLC44A1	ENSG00000070214.15	8.87e-06		PCCA	ENSG00000175198.14	6.93e-08
ACAT1	ENSG00000075239.13	9.08e-06		FBF1	ENSG00000188878.16	7.02e-08
MAST4	ENSG00000069020.18	9.33e-06		SNX4	ENSG00000114520.10	7.05e-08
ANK3	ENSG00000151150.20	9.39e-06		VRK3	ENSG00000105053.10	7.1e-08
WWP1	ENSG00000123124.13	9.47e-06		MRPS2	ENSG00000122140.10	7.15e-08
SUSD4	ENSG00000143502.14	9.51e-06		TTC33	ENSG00000113638.12	7.16e-08
HADH	ENSG00000138796.15	9.52e-06		INIP	ENSG00000148153.13	7.16e-08
DUSP9	ENSG00000130829.17	9.64e-06		SDHB	ENSG00000117118.9	7.32e-08
FUT6	ENSG00000156413.13	9.67e-06		RBM43	ENSG00000184898.6	7.51e-08
HSD17B8	ENSG00000204228.3	9.74e-06		LNX2	ENSG00000139517.7	7.58e-08
KLHDC1	ENSG00000197776.7	9.74e-06		PTPRB	ENSG00000127329.14	7.61e-08
PLRG1	ENSG00000171566.11	9.75e-06		ATP11A	ENSG00000068650.18	7.61e-08
ZNF552	ENSG00000178935.5	9.76e-06		MARS	ENSG00000166986.12	7.63e-08
PPP1R14B	ENSG00000173457.10	9.8e-06		LINC01507	ENSG00000230945.1	7.65e-08
ZC3H14	ENSG00000100722.18	9.92e-06		KLF9	ENSG00000119138.4	7.66e-08
C10orf126	ENSG00000204365.5	9.94e-06		FCER1A	ENSG00000179639.10	7.68e-08
TBC1D19	ENSG00000109680.10	9.95e-06		RP11-119D9.1	ENSG00000251637.6	7.72e-08
SAMD5	ENSG00000203727.3	1e-05		KCNN4	ENSG00000104783.11	7.81e-08
PPFIBP2	ENSG00000166387.11	1.01e-05		SERBP1P3	ENSG00000242142.1	7.82e-08
PRKD1	ENSG00000184304.14	1.01e-05		LINC00605	ENSG00000251533.2	7.84e-08
CIPC	ENSG00000198894.7	1.02e-05		C1QTNF1-AS1	ENSG00000265096.1	7.85e-08
C9orf3	ENSG00000148120.14	1.02e-05		USP27X	ENSG00000273820.1	7.94e-08
CYS1	ENSG00000205795.4	1.03e-05		ERLIN2	ENSG00000147475.14	7.95e-08
RNF19B	ENSG00000116514.16	1.03e-05		CNNM3	ENSG00000168763.15	8.01e-08
KLHL9	ENSG00000198642.6	1.04e-05		CTC-137K3.1	ENSG00000270137.1	8.07e-08
UFSP2	ENSG00000109775.10	1.04e-05		ASIC3	ENSG00000213199.7	8.17e-08
GHR	ENSG00000112964.13	1.04e-05		PACERR	ENSG00000273129.1	8.19e-08
SLC12A6	ENSG00000140199.11	1.05e-05		ACBD5	ENSG00000107897.18	8.26e-08
EBLN3	ENSG00000281649.1	1.05e-05		ADGRG1	ENSG00000205336.11	8.27e-08
F11	ENSG00000088926.13	1.05e-05		IMPA2	ENSG00000141401.11	8.29e-08
IGDCC4	ENSG00000103742.11	1.08e-05		KIF3B	ENSG00000101350.7	8.32e-08
DRAIC	ENSG00000245750.7	1.09e-05		TBL1X	ENSG00000101849.15	8.36e-08
ECI2	ENSG00000198721.12	1.1e-05		DNASE1L3	ENSG00000163687.13	8.41e-08
DDX31	ENSG00000125485.17	1.12e-05		KBTBD4	ENSG00000123444.13	8.61e-08
PTGR1	ENSG00000106853.16	1.12e-05		NUDT12	ENSG00000112874.9	8.66e-08
FAHD1	ENSG00000180185.11	1.13e-05		DCAF11	ENSG00000100897.17	8.75e-08
LINC00959	ENSG00000237489.2	1.13e-05		NPM1P27	ENSG00000249353.2	8.89e-08
TOM1L1	ENSG00000141198.13	1.14e-05		SGMS1	ENSG00000198964.13	8.93e-08
BOLA3	ENSG00000163170.11	1.15e-05		HOTAIRM1	ENSG00000233429.9	8.94e-08
VWA8	ENSG00000102763.15	1.15e-05		FAM35A	ENSG00000122376.11	9e-08
ADCY9	ENSG00000162104.9	1.15e-05		SEC24B	ENSG00000138802.11	9.12e-08
ERI2	ENSG00000196678.13	1.2e-05		HSP90AB4P	ENSG00000282100.1	9.15e-08
LDHD	ENSG00000166816.13	1.21e-05		FIS1	ENSG00000214253.8	9.16e-08
ACADSB	ENSG00000196177.12	1.21e-05		MSNP1	ENSG00000251593.1	9.28e-08
CDKL2	ENSG00000138769.10	1.22e-05		KHDRBS3	ENSG00000131773.13	9.3e-08
METTL14	ENSG00000145388.14	1.22e-05		DBT	ENSG00000137992.14	9.3e-08
STX17	ENSG00000136874.10	1.23e-05		APOOL	ENSG00000155008.13	9.35e-08
TAL2	ENSG00000186051.6	1.25e-05		SH3YL1	ENSG00000035115.21	9.36e-08
FCN2	ENSG00000160339.15	1.25e-05		LYRM7	ENSG00000186687.15	9.36e-08
ZIC2	ENSG00000043355.10	1.25e-05		OTUD7A	ENSG00000169918.9	9.45e-08
LINC00484	ENSG00000235641.4	1.25e-05		L2HGDH	ENSG00000087299.11	9.57e-08
SENP8	ENSG00000166192.14	1.26e-05		CCBL2	ENSG00000137944.16	9.6e-08
ZNF555	ENSG00000186300.11	1.27e-05		KIAA1671	ENSG00000197077.12	9.65e-08
ZNF554	ENSG00000172006.11	1.28e-05		MOCS2	ENSG00000164172.18	9.85e-08
DNAJC28	ENSG00000177692.11	1.29e-05		FCHO2	ENSG00000157107.13	9.87e-08
MTHFR	ENSG00000177000.10	1.29e-05		AP000577.2	ENSG00000280269.1	9.91e-08
TNNT1	ENSG00000105048.16	1.3e-05		RNF14	ENSG00000013561.17	9.95e-08
ETFA	ENSG00000140374.15	1.3e-05		EPB41L5	ENSG00000115109.13	9.98e-08
MAPKAPK3	ENSG00000114738.10	1.32e-05		NDFIP2	ENSG00000102471.13	1e-07
LINC00460	ENSG00000233532.5	1.32e-05		ATP6V1D	ENSG00000100554.11	1.01e-07
DSEL	ENSG00000171451.13	1.32e-05		CLDN10	ENSG00000134873.9	1.01e-07
RP4-665J23.1	ENSG00000233593.6	1.34e-05		ATP5A1	ENSG00000152234.15	1.02e-07
FBXL5	ENSG00000118564.14	1.34e-05		NEBL	ENSG00000078114.18	1.02e-07
SECISBP2L	ENSG00000138593.8	1.36e-05		RP4-789D17.5	ENSG00000271914.1	1.03e-07
TTLL11	ENSG00000175764.14	1.36e-05		FBXO34	ENSG00000178974.9	1.03e-07
SH3RF1	ENSG00000154447.14	1.37e-05		A1CF	ENSG00000148584.14	1.04e-07
TMEM246	ENSG00000165152.8	1.37e-05		NTN4	ENSG00000074527.11	1.04e-07
JPH4	ENSG00000092051.16	1.37e-05		PRKCE	ENSG00000171132.13	1.04e-07
RPS2	ENSG00000140988.15	1.37e-05		SMU1	ENSG00000122692.8	1.05e-07
ZNF549	ENSG00000121406.8	1.37e-05		TTC9	ENSG00000133985.2	1.05e-07
KAT5	ENSG00000172977.12	1.38e-05		PRKD1	ENSG00000184304.14	1.06e-07
NPC1L1	ENSG00000015520.14	1.38e-05		MFSD4	ENSG00000174514.12	1.07e-07
CIRH1A	ENSG00000141076.17	1.38e-05		AR	ENSG00000169083.15	1.07e-07
CD164	ENSG00000135535.14	1.38e-05		VPS4B	ENSG00000119541.9	1.08e-07
GCNT2	ENSG00000111846.15	1.39e-05		ZNF704	ENSG00000164684.13	1.09e-07
KIAA0391	ENSG00000100890.15	1.39e-05		COL22A1	ENSG00000169436.16	1.11e-07
ZNF165	ENSG00000197279.3	1.39e-05		TMEM159	ENSG00000011638.10	1.11e-07
UBAP2	ENSG00000137073.20	1.39e-05		CDKL2	ENSG00000138769.10	1.12e-07
PFKM	ENSG00000152556.15	1.4e-05		TCTA	ENSG00000145022.4	1.12e-07
PTH1R	ENSG00000160801.13	1.4e-05		MPP5	ENSG00000072415.8	1.12e-07
MNX1	ENSG00000130675.14	1.41e-05		GNG7	ENSG00000176533.12	1.12e-07
TMEM184C	ENSG00000164168.7	1.41e-05		STOML2	ENSG00000165283.15	1.13e-07
RUNDC1	ENSG00000198863.7	1.44e-05		IDNK	ENSG00000148057.15	1.15e-07
MRPS18B	ENSG00000204568.11	1.45e-05		KIAA0825	ENSG00000185261.13	1.15e-07
GJB1	ENSG00000169562.9	1.45e-05		RP11-423E7.2	ENSG00000279862.1	1.15e-07
MZT2A	ENSG00000173272.13	1.47e-05		DCTN6	ENSG00000104671.7	1.16e-07
NDRG2	ENSG00000165795.20	1.47e-05		APITD1	ENSG00000175279.21	1.16e-07
F11-AS1	ENSG00000251165.5	1.47e-05		RIT1	ENSG00000143622.10	1.18e-07
BUD31	ENSG00000106245.9	1.48e-05		SH3RF1	ENSG00000154447.14	1.18e-07
SLC22A24	ENSG00000197658.9	1.5e-05		PELI2	ENSG00000139946.9	1.18e-07
RP11-297L17.2	ENSG00000260963.1	1.5e-05		SLC4A4	ENSG00000080493.13	1.19e-07
PEX19	ENSG00000162735.18	1.51e-05		ABCB7	ENSG00000131269.15	1.23e-07
SDHB	ENSG00000117118.9	1.52e-05		HLF	ENSG00000108924.13	1.27e-07
OPA3	ENSG00000125741.4	1.54e-05		SIRT3	ENSG00000142082.14	1.27e-07
HABP4	ENSG00000130956.13	1.54e-05		MYL3	ENSG00000160808.9	1.29e-07
RP11-119D9.1	ENSG00000251637.6	1.55e-05		FAM13B	ENSG00000031003.10	1.31e-07
KCTD16	ENSG00000183775.10	1.57e-05		TMEM170A	ENSG00000166822.12	1.32e-07
KLHDC7A	ENSG00000179023.8	1.57e-05		AC104654.2	ENSG00000234362.5	1.32e-07
EHHADH	ENSG00000113790.10	1.58e-05		RMND5A	ENSG00000153561.12	1.33e-07
TOB1	ENSG00000141232.4	1.59e-05		TCIRG1	ENSG00000110719.9	1.33e-07
RNF185	ENSG00000138942.15	1.6e-05		SLC16A4	ENSG00000168679.17	1.34e-07
CFAP47	ENSG00000165164.12	1.6e-05		C1orf228	ENSG00000198520.10	1.34e-07
C9orf78	ENSG00000136819.14	1.62e-05		STK32B	ENSG00000152953.12	1.34e-07
